# Supplementary material for: Induced First-Trimester Abortion and Risk of Mental Disorder
Source: Atypon-hosted journal article supplement (doi:10.1056/nejmoa0905882), 2011-01-26
Supplement: nejmoa0905882_appendix.pdf [file nejmoa0905882_appendix.pdf]

## Supplementary Appendix

This appendix has been provided by the authors to give readers additional information about their work.

Supplement to: Munk-Olsen T, Laursen TM, Pedersen CB, Lidegaard  $\Phi$ , Mortensen PB. Induced first-trimester abortion and risk of mental disorder. *N Engl J Med* 2011;364:332-39.

Supplementary Figure 1a

Incidence rate ratios of first time psychiatric contacts with any mental disorder before and after 1<sup>st</sup> trimester induced abortion \*

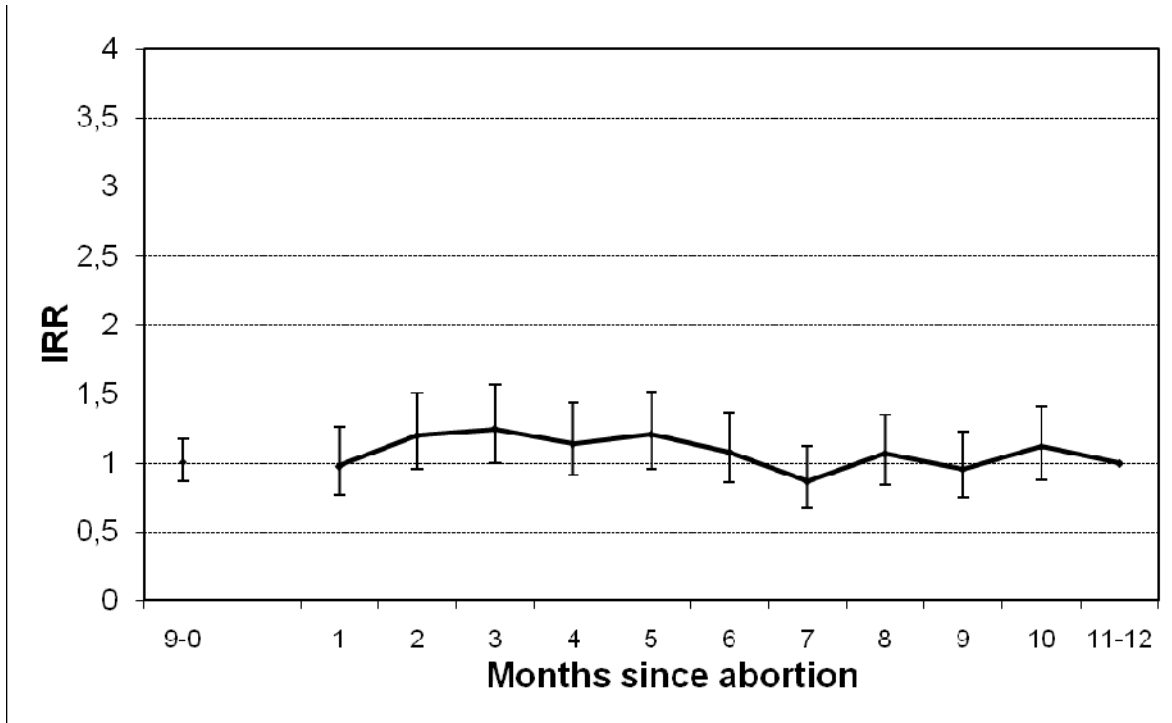

\*  
Adjusted for age and calendar period.

IRR: Incidence rate ratios.

The period 9-0: Due to comparable rates in the pre-abortion period estimates for the IRR were collapsed. Results for the 9 months pre-abortion period divided in 3-month groups were the following: 9 to 7 months prior abortion IRR: 1.03 (95% CI: 0.85, 1.23), 6 to 4 months prior abortion IRR: 1.00 (95% CI: 0.84, 1.20), 3 months prior to time of abortion (covering a pregnancy period) IRR: 1.01 (95% CI: 0.84, 1.21).

Reference group: Women having abortions 11-12 months prior.

Supplementary Figure 1b

Incidence rate ratios of first time psychiatric contacts with any mental disorder before and after childbirth \*

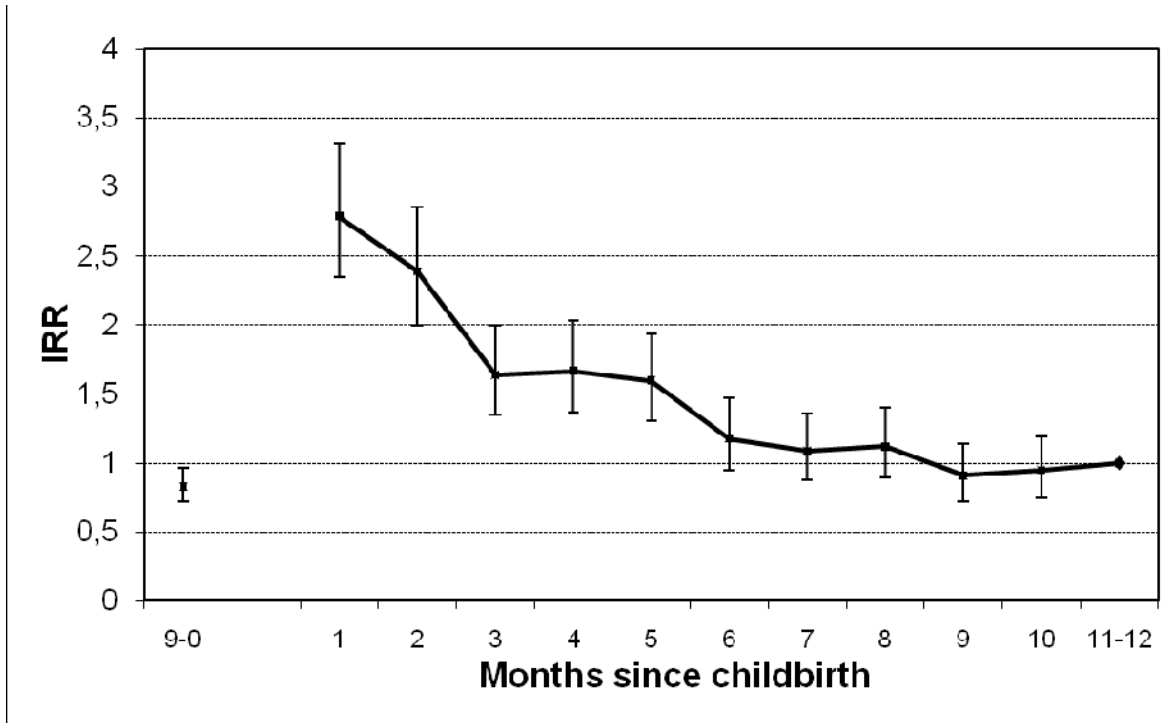

\*  
Adjusted for age and calendar period.

IRR: Incidence rate ratios.

The period 9-0: Due to comparable rates in the pregnancy period estimates for the IRR were collapsed. Results for the 9 months pre-childbirth period divided in 3-month groups were the following: First trimester pregnancy IRR: 0.78 (95% CI: 0.64, 0.93), second trimester pregnancy IRR: 0.87 (95% CI: 0.72, 1.03), third trimester pregnancy IRR: 0.85 (95% CI: 0.72, 1.02).

Reference group: Women giving birth 11-12 months prior.
